# Supplementary material for: Life‐Course Reproductive History and Cardiovascular Risk Profile in Late Mid‐Life: The CARDIA Study
Source: PubMed Central journal article supplement — J Am Heart Assoc. 2020 May 5;9(10):e014859. doi: 10.1161/JAHA.119.014859 (PMC7660840; doi:10.1161/jaha.119.014859), 2020-05-05

# **SUPPLEMENTAL MATERIAL**

**Table S1. Number and proportion of women with vasomotor symptoms of menopause by PTB/SGA history.**

|                            | <b>No PTB/SGA<br/><i>n=1340</i></b> | <b>PTB/SGA<br/><i>n=526</i></b> |
|----------------------------|-------------------------------------|---------------------------------|
| No vasomotor symptoms      | 324, 24                             | 118, 22                         |
| Vasomotor symptoms         | 1016, 76                            | 408, 78                         |
| Severe vasomotor symptoms* | 401, 30                             | 189, 36                         |

PTB/SGA: preterm birth and/or small-for-gestational age delivery; Women with a history of PTB/SGA were more likely to have experienced severe vasomotor symptoms of menopause versus women with no history of PTB/SGA. \* indicates  $p < 0.02$  for comparison between groups. Data are n, %.

**Table S2. Unadjusted ASCVD risk scores by life-course reproductive history in black and white women.**

|                       | <i>ASCVD Risk in Black Women (%)<br/>n=887</i> | <i>ASCVD Risk in White Women (%)<br/>n=913</i> |
|-----------------------|------------------------------------------------|------------------------------------------------|
| No exposures          | 5.3 (4.4, 6.2)                                 | 2.1 (1.9, 2.4)                                 |
| PTB/SGA only          | 6.2 (4.5, 7.7)                                 | 2.3 (1.7, 3.0)                                 |
| Vasomotor only        | 5.6 (5.1, 6.1)                                 | 2.2 (2.1, 2.4)                                 |
| PTB/SGA and vasomotor | 5.7 (4.9, 6.4)                                 | 2.4 (2.1, 2.8)                                 |

PTB/SGA: preterm birth and/or small-for-gestational age delivery; ASCVD: atherosclerotic cardiovascular disease. Data are mean and 95% confidence interval (CI). No differences in ASCVD risk scores by reproductive exposure category in black or white women.

**Table S3. Demographic and clinical characteristics of women at Y30 who were nulliparous at baseline by life-course reproductive history.**

|                               | <i>-/-</i><br><i>n=247</i> | <i>+/-</i><br><i>n=61</i> | <i>-/+</i><br><i>n=688</i> | <i>+/+</i><br><i>n=194</i> |
|-------------------------------|----------------------------|---------------------------|----------------------------|----------------------------|
| <b>Age (yrs)*</b>             | 54±1                       | 53±1                      | 55±1                       | 54±1                       |
| <b>Black Race (n, %)*</b>     | 73, 30                     | 34, 56                    | 238, 35                    | 98, 51                     |
| <b>Education (yrs)*</b>       | 16±1                       | 15±1                      | 16±1                       | 16±1                       |
| <b>Smoking Status (n, %)</b>  |                            |                           |                            |                            |
| Current                       | 18, 7                      | 6, 10                     | 62, 9                      | 24, 13                     |
| Former                        | 60, 25                     | 13, 21                    | 177, 26                    | 42, 22                     |
| <b>Parity (n, %)*</b>         |                            |                           |                            |                            |
| 0                             | 106, 43                    | 0, 0                      | 370, 54                    | 0, 0                       |
| 1                             | 53, 21                     | 20, 33                    | 103, 15                    | 56, 29                     |
| ≥2                            | 85, 36                     | 44, 67                    | 208, 31                    | 145, 71                    |
| <b>BMI (kg/m<sup>2</sup>)</b> | 30.9±0.5                   | 31.6±1.0                  | 29.7±0.3                   | 29.5±0.5                   |
| <b>Hypertension (n, %)</b>    | 108, 44                    | 28, 46                    | 296, 43                    | 97, 50                     |
| <b>Diabetes (n, %)</b>        | 33, 13                     | 9, 14                     | 74, 11                     | 22, 11                     |
| <b>SBP (mmHg)</b>             | 116±1                      | 118±2                     | 117±1                      | 118±1                      |
| <b>DBP (mmHg)</b>             | 72±1                       | 72±1                      | 72±1                       | 73±1                       |
| <b>TC (mg/dL)</b>             | 193±2                      | 198±5                     | 199±1                      | 197±3                      |
| <b>HDL-C (mg/dL)*</b>         | 65±1                       | 63±3                      | 68±1                       | 68±1                       |
| <b>LDL-C (mg/dL)</b>          | 110±2                      | 116±5                     | 112±1                      | 111±2                      |
| <b>Triglycerides (mg/dL)</b>  | 92±3                       | 95±6                      | 94±2                       | 91±4                       |

PTB/SGA: preterm birth and/or small-for-gestational age delivery; -/-: neither PTB/SGA nor vasomotor symptoms; +/- PTB/SGA only; -/+: vasomotor symptoms only; +/+ both PTB/SGA and vasomotor symptoms; Parity: number of pregnancies lasting ≥ 20 wks; BMI: body mass index, SBP: systolic blood pressure, DBP: diastolic blood pressure, TC: total cholesterol, HDL-C: high-density lipoprotein cholesterol, LDL-C: low-density lipoprotein cholesterol. \*indicates a difference between reproductive history categories.

**Table S4. ASCVD risk scores by life-course reproductive history in women who were nulliparous at baseline.**

|                       | <i>Unadjusted (%)</i> | <i>95% CI</i> |
|-----------------------|-----------------------|---------------|
| No exposures          | 2.7                   | (2.0, 2.9)    |
| PTB/SGA only          | 3.4                   | (2.2, 4.7)    |
| Vasomotor only        | 2.9                   | (2.3, 2.9)    |
| PTB/SGA and vasomotor | 2.9                   | (2.4, 3.3)    |

PTB/SGA: preterm birth and/or small-for-gestational age delivery; ASCVD: atherosclerotic cardiovascular disease. Data are mean and 95% confidence interval (CI). No differences in ASCVD risk scores between categories in women who were nulliparous at baseline.

**Figure S1. Study Inclusion Diagram.**

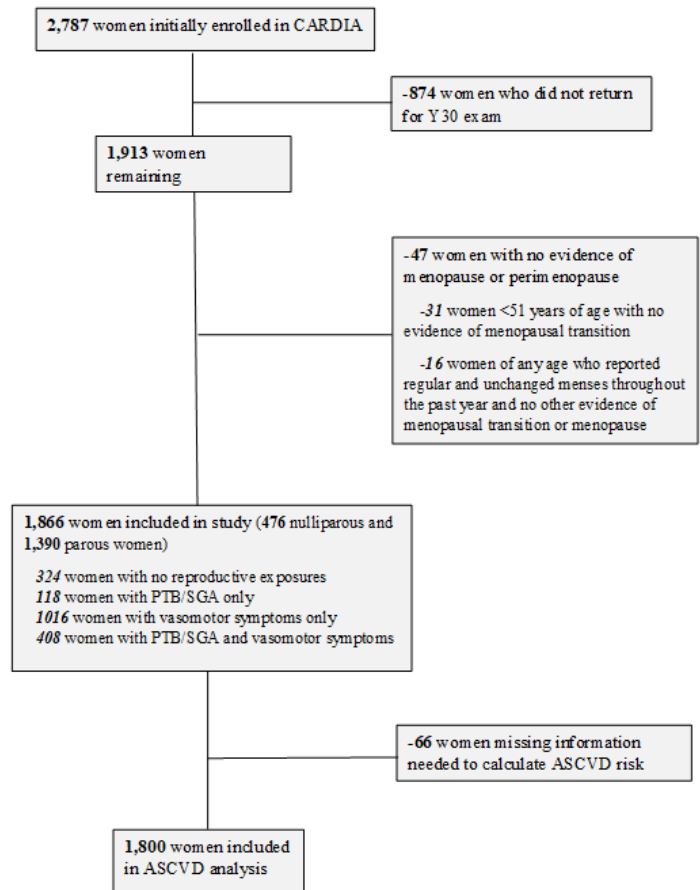

Supplement: JAH3-9-e014859-s001.pdf [file JAH3-9-e014859-s001.pdf]
